# Supplementary material for: Ion-biosorption induced core–shell Fe2P@carbon nanoparticles decorated on N, P co-doped carbon materials for the oxygen evolution reaction
Source: Royal Society of Chemistry journal article supplement (doi:10.1039/d1qi00188d), 2021-01-01
Supplement: d1qi00188d1.pdf [file d1qi00188d1.pdf]

## Supporting Information

### **Ion-biosorption induced core-shell Fe<sub>2</sub>P@carbon nanoparticles decorated on N, P co-doped carbon materials for oxygen evolution reaction**

*Min Jiang,<sup>a,1</sup> Wei Fan,<sup>b,1</sup> Anquan Zhu,<sup>a</sup> Pengfei Tan,<sup>a</sup> Jianping Xie<sup>\*,b,c</sup> and Jun Pan<sup>\*,a</sup>*

<sup>a</sup>State Key Laboratory for Powder Metallurgy, Central South University Lushan South Street 932, Changsha 410083, China.

<sup>b</sup>School of Minerals Processing and Bioengineering, Central South University Lushan South Street 932, Changsha 410083, China.

<sup>c</sup>Key Laboratory of Biometallurgy, Ministry of Education, Changsha 410083, China

<sup>1</sup>These authors contributed to this work equally

\*corresponding author: [jun.pan@csu.edu.cn](mailto:jun.pan@csu.edu.cn); [xiejianping@csu.edu.cn](mailto:xiejianping@csu.edu.cn)

Fax: +86-731-88871017; Tel: +86-731-88836329

Table S1 The atomic composition of samples tested by XPS

| Sample name | Atomic composition (%) (XPS) |      |      |      |       |
|-------------|------------------------------|------|------|------|-------|
|             | C                            | N    | P    | Fe   | O     |
| NPC-1       | 83.69                        | 4.33 | 2.26 | 0.00 | 9.32  |
| NPC-2       | 84.2                         | 4.84 | 1.66 | 0.58 | 8.73  |
| S-800       | 71.91                        | 5.37 | 2.44 | 4.01 | 16.28 |

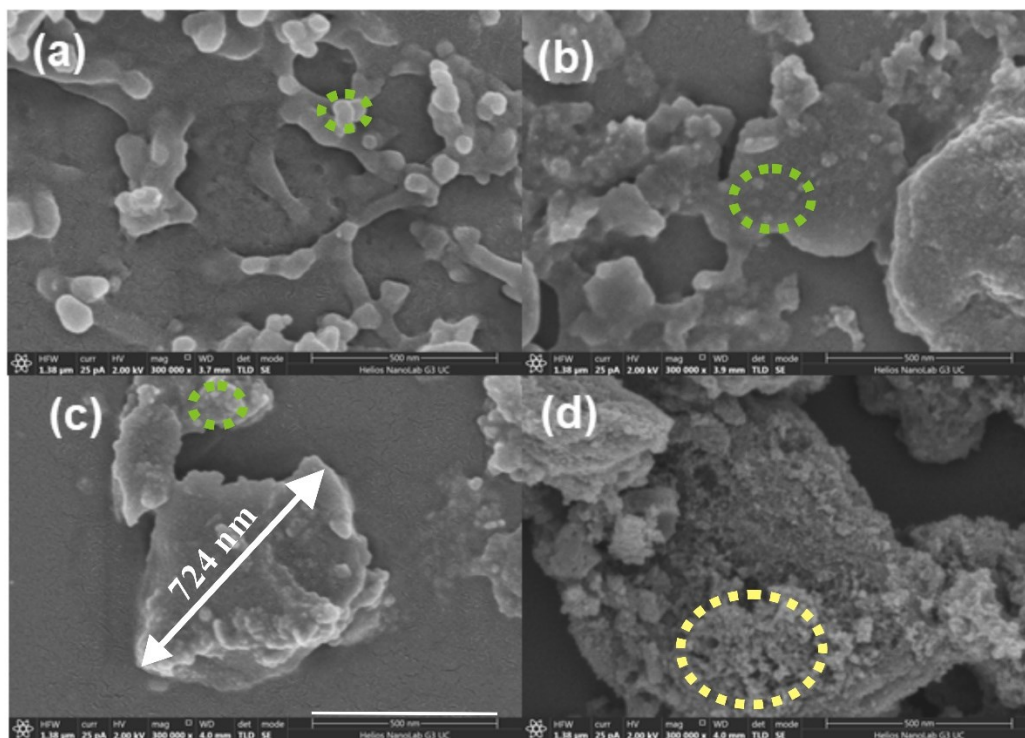

Fig. S1 The SEM images of S-500, S-600, S-700 and S-800 at the scale bar of 500 nm

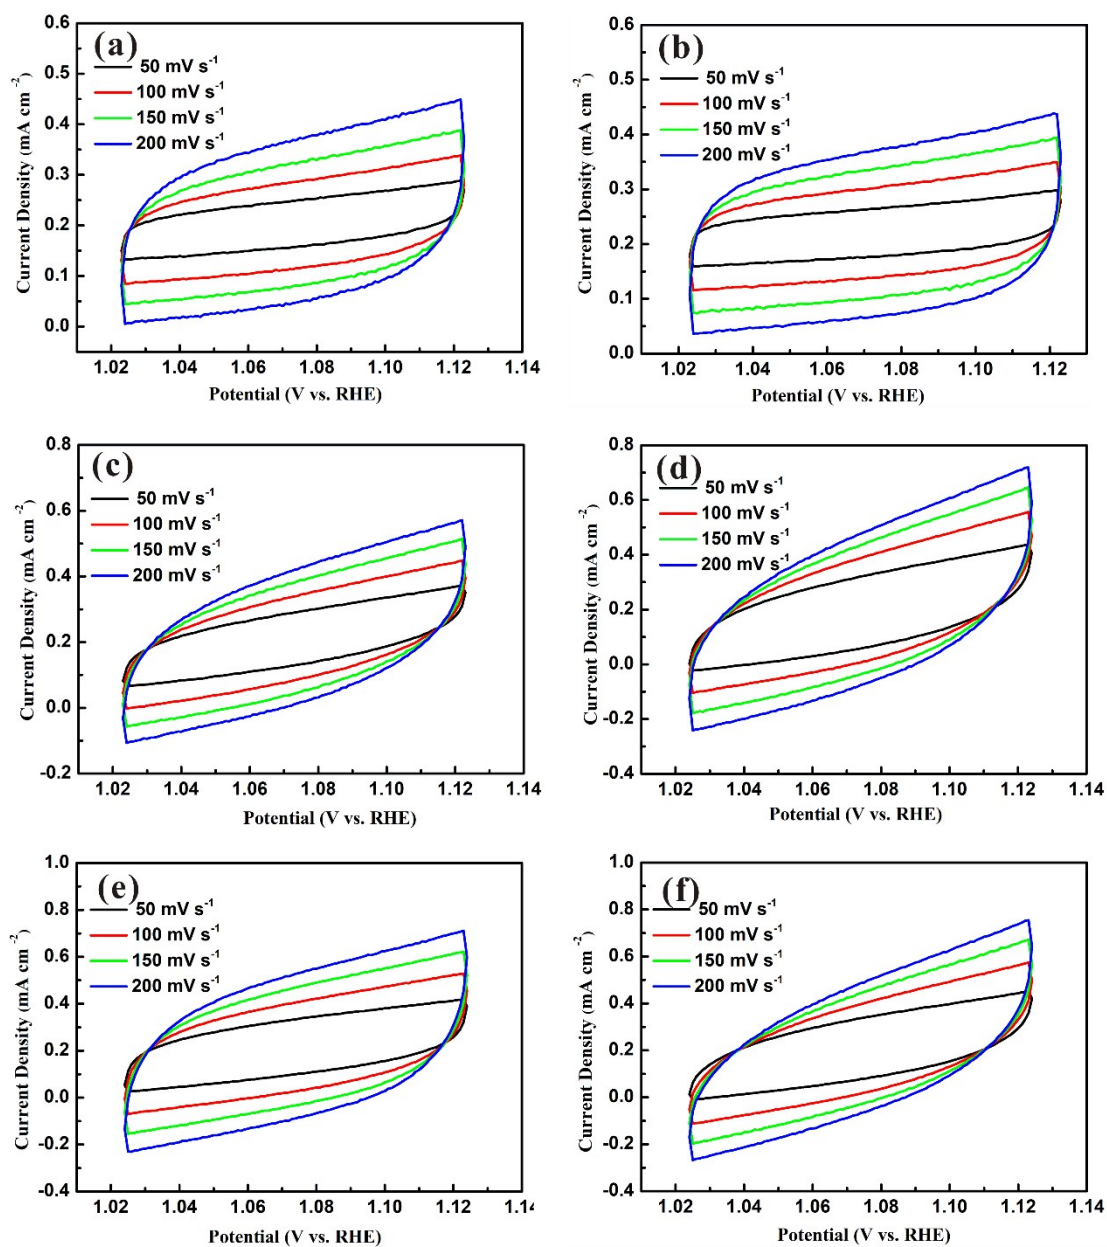

Fig. S2 CV curves of S-500 (a), S-600 (b), S-700 (c), S-800 (d), NPC-1 (e) and NPC-2 (f) obtained at 50, 100, 150 and 200 mV s<sup>-1</sup> in the range of 1.023–1.123 V vs. RHE.

Table S2 Summary of electrochemical parameters of metal phosphides using common synthesis method for oxygen evolution reaction

| Sample                                   | Precursor                                            | $\eta_{j=10 \text{ mA}}$<br>cm <sup>-2</sup> | Electrolyte | Ref.      |
|------------------------------------------|------------------------------------------------------|----------------------------------------------|-------------|-----------|
| FeP                                      | Fe-PA                                                | 300 mV                                       | 0.1 M KOH   | 1         |
| FeP@GPC                                  | Fe-MIL-88                                            | 278 mV                                       | 1.0 M KOH   | 2         |
| CoP@NPCSs                                | Co(II)-PDA                                           | 350 mV                                       | 1.0 M KOH   | 3         |
| Fe <sub>2-x</sub> Mn <sub>x</sub> P      | Fe(CO) <sub>5</sub>                                  | 440 mV                                       | 1.0 M KOH   | 4         |
| FeP <sub>x</sub>                         | Fe(acac) <sub>3</sub>                                | 320 mV                                       | 1.0 M KOH   | 5         |
| NiFeP                                    | NiFe-PA                                              | 315 mV                                       | 1.0 M KOH   | 6         |
| Fe <sub>2</sub> P@NPC                    | Fe(NO <sub>3</sub> ) <sub>3</sub> •9H <sub>2</sub> O | 550 mV                                       | 1.0 M KOH   | 7         |
| Fe <sub>2</sub> P                        | FeCl <sub>3</sub>                                    | 497mV                                        | 1.0 M KOH   | 8         |
| Fe <sub>2</sub> P@NC                     | Melamine                                             | 415 mV                                       | 1.0 M KOH   | 9         |
| Co <sub>2</sub> P@NC-Fe <sub>2</sub> P-3 | FeHP-ZIF-67-3                                        | 290mV                                        | 1.0 M KOH   | 10        |
| Fe <sub>2</sub> P                        | E. coli BL21                                         | 266 mV                                       | 1.0 M KOH   | This work |

## References

1. R. Zhang, C. Zhang, W. Chen, FeP embedded in N, P dual-doped porous carbon nanosheets: an efficient and durable bifunctional catalyst for oxygen reduction and evolution reactions, *J Mater Chem A*, 2016, 4, 18723-18729.

2. Y. Yao, N. Mahmood, L. Pan, G. Shen, R. Zhang, R. Gao, F.-e. Aleem, X. Yuan, X. Zhang, J.-J. Zou, Iron phosphide encapsulated in P-doped graphitic carbon as efficient and stable electrocatalyst for hydrogen and oxygen evolution reactions, *Nanoscale*, 2018, 10, 21327-21334.
3. K. Wu, Z. Chen, W.-C. Cheong, S. Liu, W. Zhu, X. Cao, K. Sun, Y. Lin, L. Zheng, W. Yan, Toward bifunctional overall water splitting electrocatalyst: general preparation of transition metal phosphide nanoparticles decorated N-doped porous carbon spheres, *Acs Appl Mater Inter*, 2018, 10, 44201-44208.
4. D. Li, H. Baydoun, B. Kulikowski, S.L. Brock, Boosting the catalytic performance of iron phosphide nanorods for the oxygen evolution reaction by incorporation of manganese, *Chemistry of Materials*, 2017, 29, 3048-3054.
5. D.P. Leonard, W.F. Stickle, X. Ji, Carbon-Supported Iron Phosphides: Highest Intrinsic Oxygen Evolution Activity of the Iron Triad, *ACS Appl Energ Mater*, 2018, 1, 3593-3597.
6. Z. Liu, G. Zhang, K. Zhang, H. Liu, J. Qu, Facile dispersion of nanosized NiFeP for highly effective catalysis of oxygen evolution reaction, *Acs Sustain Chem Eng*, 2018, 6, 7206-7211.
7. J. Wang, F. Ciucci, In-situ synthesis of bimetallic phosphide with carbon tubes as an active electrocatalyst for oxygen evolution reaction, *Applied Catalysis B-Environmental*, 2019, 254, 292-299.
8. G. Liu, N. Li, Y. Zhao, R. Yao, M. Wang, D. He, J. Li, Fabrication of Fe-doped Co<sub>2</sub>P nanoparticles as efficient electrocatalyst for electrochemical and photoelectrochemical water oxidation, *Electrochimica Acta*, 2018, 283, 1490-1497.
9. Z. Pu, C. Zhang, I.S. Amiin, W. Li, L. Wu, S. Mu, General Strategy for the

Synthesis of Transition-Metal Phosphide/N-Doped Carbon Frameworks for Hydrogen and Oxygen Evolution, *Acs Applied Materials & Interfaces*, 2017, 9, 16187-16193.

10. Y.-J. Tang, L. You, K. Zhou, Enhanced Oxygen Evolution Reaction Activity of a  $\text{Co}_2\text{P}@NC\text{-Fe}_2\text{P}$  Composite Boosted by Interfaces Between a N-Doped Carbon Matrix and  $\text{Fe}_2\text{P}$  Microspheres, *Acs Applied Materials & Interfaces*, 2020, 12, 25884-25894.
